# Supplementary material for: Assessment of occurrence, source appointment, and ecological risks of pharmaceuticals and personal care products in the water–sediment interface of Qiantang River in the Hangzhou region
Source: Royal Society of Chemistry journal article supplement (doi:10.1039/d4em00355a), 2024-01-01
Supplement: d4em00355a2.pdf [file d4em00355a2.pdf]

## Supporting Information

### Instrumental conditions

For UPLC-MS/MS with positive ESI mode, a Zorbax SBC18 (100 mm × 3 mm, 1.8 μm particle size) column with its corresponding precolumn filter (2.1 mm, 0.2 μm) from Agilent Technologies was used for chromatographic separation. The column was kept at 40 °C and the injection volume was 5.0 μL. The mobile phases used were (A) Milli-Q water (containing 5 mmol/L ammonium acetate and 0.05 % formic acid (v/v)) and (B) methanol. The gradient program was as follows: 50 % B at 0 min, increased to 80 % B in 5 min, stepped to 90 % B in 0.5 min, and held for 5.5 min at a flow rate of 0.30 mL/min; a post run time was set at 4.5 min for column equilibration before the next injection. The whole analysis time for each sample was 15.5 min. For UPLC-MS/MS with negative ESI mode, the column brand, column temperature, and the injection volume were the same as those in positive ESI mode. The mobile phase consisted of Milli-Q water (A) and methanol (B). The gradient elution program was set as follows: 50 % B at 0 min, increased to 56 % B in 3 min, stepped to 90 % B in 1 min, and held for 4.5 min at a flow rate of 0.35 mL/min; a post run time was set at 5 min for column equilibration before the next injection. The whole analysis time for each sample was 13.5 min. The operating conditions (fragmentor voltage, collision energy (CE), precursor ion and product ions for each compound) for mass spectrometry were optimized by Optimizer (Agilent, USA), to maximize the response and increase detection sensitivity. Quantitative analysis of the target compounds was performed in multiple reaction monitoring (MRM) mode. Agilent Mass Hunter V 02.01 software was used for data acquisition.

**Table S1 Recoveries, limit of quantification (LOQ) and relative standard deviation (RSD) of target PPCPs in surface water samples.**

| PPCPs | Water sample |             |         |
|-------|--------------|-------------|---------|
|       | Recovery (%) | LODs (ng/L) | RSD (%) |
| BT    | 87.2±4.1     | 0.37        | 1.7     |
| 5-TT  | 90.0±3.2     | 0.32        | 1.9     |
| CBT   | 91.3±2.3     | 0.27        | 1.4     |
| XT    | 88.4±3.2     | 0.31        | 1.8     |
| MP    | 92.7±4.1     | 0.06        | 1.6     |
| EP    | 91.5±2.9     | 0.08        | 1.4     |
| PP    | 87.1±4.6     | 0.09        | 1.3     |
| BP    | 85.9±3.2     | 0.08        | 1.5     |
| TCS   | 91.8±3.7     | 0.07        | 1.7     |
| TCC   | 91.5±3.6     | 0.09        | 1.5     |

**Table S2 Recoveries, limit of quantification (LOQ) and relative standard deviation (RSD) of target PPCPs in sediment samples.**

| PPCPs | Sediment sample |             |         |
|-------|-----------------|-------------|---------|
|       | Recovery (%)    | LODs (ng/g) | RSD (%) |
| BT    | 82.1±3.7        | 1.19        | 2.7     |
| 5-TT  | 84.2±4.6        | 0.48        | 3.1     |
| CBT   | 85.3±3.1        | 1.01        | 2.8     |
| XT    | 85.9±3.2        | 0.53        | 3.6     |

|     |                |      |     |
|-----|----------------|------|-----|
| MP  | $84.3 \pm 3.9$ | 0.12 | 2.9 |
| EP  | $83.9 \pm 4.0$ | 0.17 | 3.4 |
| PP  | $83.4 \pm 3.5$ | 0.14 | 2.2 |
| BP  | $85.7 \pm 6.7$ | 0.16 | 2.7 |
| TCS | $80.6 \pm 5.4$ | 0.21 | 2.8 |
| TCC | $82.8 \pm 4.8$ | 0.18 | 3.0 |

---

**Table S3 The PPCPs concentration of water in wet season**

| Sampling sites | BT<br>ng/L | 5-TT<br>ng/L | CBT<br>ng/L | XT<br>ng/L | MP<br>ng/L | EP<br>ng/L | PP<br>ng/L | BP<br>ng/L | TCC<br>ng/L | TCS<br>ng/L |
|----------------|------------|--------------|-------------|------------|------------|------------|------------|------------|-------------|-------------|
| YP-L           | 14.90      | 5.39         | 6.61        | 2.13       | 1.86       | <LOD       | 1.16       | 0.83       | 1.29        | 49.93       |
| YP-M           | 32.20      | 8.87         | 9.20        | 2.68       | 2.51       | <LOD       | 0.98       | 0.83       | 1.05        | 52.06       |
| YP-R           | 34.78      | 9.58         | 8.18        | 2.77       | 1.97       | <LOD       | 0.95       | 0.84       | 0.85        | 46.15       |
| ZK-L           | 37.58      | 29.91        | 10.69       | 5.68       | 1.20       | <LOD       | 0.86       | 0.81       | 1.06        | 49.66       |
| ZK-M           | 33.49      | 35.07        | 10.59       | 5.98       | 1.15       | <LOD       | 0.76       | 0.81       | 0.85        | 42.19       |
| ZK-R           | 50.30      | 36.91        | 12.64       | 6.03       | 1.12       | <LOD       | 0.82       | 0.84       | 0.80        | 39.99       |
| QB-L           | 22.36      | 11.13        | 10.09       | 3.15       | 1.14       | <LOD       | 0.93       | 0.80       | 0.74        | 41.03       |
| QB-M           | 28.47      | 13.57        | 7.77        | 3.66       | 1.16       | <LOD       | 0.87       | 0.83       | 0.91        | 54.59       |
| QB-R           | 26.26      | 13.97        | 8.79        | 3.87       | 1.14       | <LOD       | 2.70       | 0.81       | 0.77        | 52.91       |
| ZTJ-L          | 26.70      | 11.97        | 6.95        | 3.49       | 1.20       | <LOD       | 0.84       | 0.79       | 0.86        | 35.98       |
| ZTJ-M          | 27.38      | 12.22        | 6.08        | 3.81       | 1.12       | <LOD       | 0.81       | 0.77       | 0.82        | 54.92       |
| ZTJ-R          | 22.30      | 12.88        | 5.93        | 3.72       | 1.22       | <LOD       | 0.84       | 1.02       | 0.32        | 33.03       |

**Table S4 The PPCPs concentration of water in dry season**

| <b>Sampling sites</b> | <b>BT<br/>ng/L</b> | <b>5-TT<br/>ng/L</b> | <b>CBT<br/>ng/L</b> | <b>XT<br/>ng/L</b> | <b>MP<br/>ng/L</b> | <b>EP<br/>ng/L</b> | <b>PP<br/>ng/L</b> | <b>BP<br/>ng/L</b> | <b>TCC<br/>ng/L</b> | <b>TCS<br/>ng/L</b> |
|-----------------------|--------------------|----------------------|---------------------|--------------------|--------------------|--------------------|--------------------|--------------------|---------------------|---------------------|
| YP-L                  | 17.96              | 8.54                 | 7.89                | 3.68               | 2.05               | <LOD               | 1.56               | 1.78               | 3.81                | 51.39               |
| YP-M                  | 18.84              | 9.68                 | 8.54                | 3.74               | 2.14               | <LOD               | 1.74               | 1.94               | 3.12                | 54.28               |
| YP-R                  | 19.79              | 8.67                 | 8.12                | 4.15               | 2.23               | <LOD               | 1.69               | 1.79               | 3.96                | 50.12               |
| ZK-L                  | 25.28              | 15.66                | 9.21                | 6.71               | 2.41               | <LOD               | 1.81               | 1.89               | 4.71                | 57.94               |
| ZK-M                  | 26.36              | 14.91                | 10.3                | 7.33               | 2.34               | <LOD               | 1.49               | 2.01               | 5.56                | 59.81               |
| ZK-R                  | 31.11              | 17.13                | 10.71               | 6.82               | 2.29               | <LOD               | 1.56               | 2.09               | 4.92                | 59.67               |
| QB-L                  | 28.79              | 14.85                | 10.44               | 9.57               | 2.17               | <LOD               | 1.89               | 2.15               | 6.44                | 60.27               |
| QB-M                  | 29.65              | 16.93                | 10.24               | 9.43               | 2.28               | <LOD               | 1.78               | 2.34               | 7.04                | 63.12               |
| QB-R                  | 30.32              | 15.57                | 12.51               | 10.11              | 2.26               | <LOD               | 1.66               | 2.28               | 6.28                | 61.57               |
| ZTJ-L                 | 47.45              | 31.51                | 13.58               | 12.65              | 2.75               | <LOD               | 2.03               | 2.67               | 8.56                | 77.35               |
| ZTJ-M                 | 46.58              | 29.84                | 14.12               | 12.43              | 2.8                | <LOD               | 2.11               | 2.45               | 7.89                | 79.21               |
| ZTJ-R                 | 45.66              | 30.45                | 14.79               | 13.91              | 2.66               | <LOD               | 2.16               | 2.59               | 8.12                | 74.13               |

**Table S5 The PPCPs concentration in sediment of Qiantang river**

| <b>Sampling sites</b> | <b>BT<br/>ng/g</b> | <b>5-TT<br/>ng/g</b> | <b>CBT<br/>ng/g</b> | <b>XT<br/>ng/g</b> | <b>MP<br/>ng/g</b> | <b>EP<br/>ng/g</b> | <b>PP<br/>ng/g</b> | <b>BP<br/>ng/g</b> | <b>TCC<br/>ng/g</b> | <b>TCS<br/>ng/g</b> |
|-----------------------|--------------------|----------------------|---------------------|--------------------|--------------------|--------------------|--------------------|--------------------|---------------------|---------------------|
| <b>Wet season</b>     |                    |                      |                     |                    |                    |                    |                    |                    |                     |                     |
| YP                    | 2.59               | 1.95                 | 2.02                | 0.97               | 5.31               | <LOD               | 0.73               | 0.74               | 4.00                | 60.84               |
| ZK                    | 2.78               | 3.29                 | 2.03                | 0.83               | 2.45               | <LOD               | 0.74               | 0.73               | 3.57                | 46.82               |
| QB                    | 3.08               | 2.86                 | 1.65                | 0.89               | 2.21               | <LOD               | 0.78               | 0.75               | 3.08                | 65.36               |
| ZTJ                   | 2.59               | 3.38                 | 1.47                | 0.91               | 2.35               | <LOD               | 0.72               | 0.74               | 2.76                | 50.60               |
| <b>Dry season</b>     |                    |                      |                     |                    |                    |                    |                    |                    |                     |                     |
| YP                    | 2.47               | 2.60                 | 2.25                | 0.86               | 1.65               | <LOD               | 0.74               | 0.73               | 3.51                | 60.25               |
| ZK                    | 3.01               | 3.09                 | 1.85                | 0.95               | 2.58               | <LOD               | 0.73               | 0.73               | 5.45                | 54.15               |
| QB                    | 3.24               | 2.62                 | 1.82                | 0.82               | 2.30               | <LOD               | 0.75               | 0.73               | 3.26                | 58.33               |
| ZTJ                   | 3.08               | 4.15                 | 1.24                | 0.88               | 2.41               | <LOD               | 0.77               | 0.79               | 4.15                | 57.29               |

**Table S6 The physicochemical parameters of QTR in wet and dry seasons**

| Sampling sites    | TOC mg/L | TP mg/L | TN mg/L | NH <sub>3</sub> -N mg/L |
|-------------------|----------|---------|---------|-------------------------|
| <b>Wet season</b> |          |         |         |                         |
| YP-L              | 2.34     | 0.03    | 2.27    | 0.325                   |
| YP-M              | 1.74     | 0.04    | 1.81    | 0.041                   |
| YP-R              | 2.24     | 0.03    | 1.88    | 0.038                   |
| ZK-L              | 3.02     | 0.06    | 2.15    | 0.046                   |
| ZK-M              | 3.42     | 0.07    | 2.35    | 0.044                   |
| ZK-R              | 3.65     | 0.11    | 2.22    | 0.044                   |
| QB-L              | 2.17     | 0.04    | 1.60    | 0.032                   |
| QB-M              | 2.08     | 0.04    | 1.94    | 0.049                   |
| QB-R              | 2.16     | 0.03    | 1.55    | 0.035                   |
| ZTJ-L             | 2.39     | 0.05    | 1.65    | 0.041                   |
| ZTJ-M             | 2.43     | 0.05    | 1.54    | 0.046                   |
| ZTJ-R             | 2.21     | 0.03    | 1.69    | 0.044                   |
| <b>Dry season</b> |          |         |         |                         |
| YP-L              | 2.32     | 0.07    | 2.50    | 0.336                   |
| YP-M              | 2.34     | 0.08    | 2.41    | 0.327                   |
| YP-R              | 2.38     | 0.08    | 2.48    | 0.302                   |
| ZK-L              | 2.43     | 0.07    | 2.49    | 0.404                   |
| ZK-M              | 2.55     | 0.08    | 2.47    | 0.367                   |

|       |      |      |      |       |
|-------|------|------|------|-------|
| ZK-R  | 2.77 | 0.08 | 2.58 | 0.330 |
| QB-L  | 2.49 | 0.07 | 2.15 | 0.247 |
| QB-M  | 2.67 | 0.08 | 2.43 | 0.231 |
| QB-R  | 2.79 | 0.08 | 2.28 | 0.259 |
| ZTJ-L | 3.56 | 0.08 | 2.27 | 0.451 |
| ZTJ-M | 3.53 | 0.08 | 2.30 | 0.439 |
| ZTJ-R | 3.56 | 0.08 | 2.28 | 0.461 |

---



**Table S7 The total organic carbon (TOC) content of the sediment in QTR**

| <b>Sampling sites</b> | <b>TOC %(Wet season)</b> | <b>TOC %(Dry season)</b> |
|-----------------------|--------------------------|--------------------------|
| YP                    | 0.376                    | 0.384                    |
| ZK                    | 0.337                    | 0.347                    |
| QB                    | 0.178                    | 0.187                    |
| ZTJ                   | 0.242                    | 0.245                    |

**Table S8 The correlation between PPCPs in water and sediment**

| <b>Correaltions in wet season</b>                           |                     |                                     |                                        |
|-------------------------------------------------------------|---------------------|-------------------------------------|----------------------------------------|
|                                                             |                     | <b>PPCPs concentration in water</b> | <b>PPCPs concentration in sediment</b> |
| PPCPs concentration in water                                | Pearson Correlation | 1                                   | .778**                                 |
|                                                             | Sig. (2-tailed)     |                                     | .000                                   |
|                                                             | N                   | 36                                  | 36                                     |
| PPCPs concentration in sediment                             | Pearson Correlation | .778**                              | 1                                      |
|                                                             | Sig. (2-tailed)     | .000                                |                                        |
|                                                             | N                   | 36                                  | 36                                     |
| **. Correlation is significant at the 0.01 level (2-tailed) |                     |                                     |                                        |
| <b>Correaltions in dry season</b>                           |                     |                                     |                                        |
|                                                             |                     | <b>PPCPs concentration in water</b> | <b>PPCPs concentration in sediment</b> |
| PPCPs concentration in water                                | Pearson Correlation | 1                                   | .858**                                 |
|                                                             | Sig. (2-tailed)     |                                     | .000                                   |
|                                                             | N                   | 36                                  | 36                                     |
| PPCPs concentration in sediment                             | Pearson Correlation | .858**                              | 1                                      |
|                                                             | Sig. (2-tailed)     | .000                                |                                        |
|                                                             | N                   | 36                                  | 36                                     |
| **. Correlation is significant at the 0.01 level (2-tailed) |                     |                                     |                                        |

Table S9 Summary of the worldwide occurrence of PPCPs in surface water

| Compound | Detected concentration | River                  | Country | Reference                                                                                                                                                                                         |
|----------|------------------------|------------------------|---------|---------------------------------------------------------------------------------------------------------------------------------------------------------------------------------------------------|
| PPCPs    | 1-500 ng/L             | Jinsha River Basin     | China   | Anthropogenic disturbances on distribution and sources of pharmaceuticals and personal care products throughout the Jinsha River Basin, China                                                     |
| TCC      | 23 ng/g in sediment    | Cau River              | Vietnam | Occurrence of pharmaceutical and personal care products in Cau River, Vietnam                                                                                                                     |
| MP       | 170.87 µg/L            | Lobo reservoir         | Brazil  | Occurrence of PPCPs in a Brazilian water reservoir and their removal efficiency by ecological filtration                                                                                          |
| MP       | 8µg/L                  | the river Mogi Guaçu   | Brazil  | Determination of parabens in surface water from Mogi Guaçu River (São Paulo, Brazil) using dispersive liquid-liquid microextraction based on low density solvent and LC-DAD                       |
| TCS      | 8.87-91.74 ng/L        | sewage treatment plant | India   | Occurrence, seasonal variation, mass loading and fate of pharmaceuticals and personal care products (PPCPs) in sewage treatment plants in cities of upper Ganges bank, India                      |
| TCS      | 98.62 ng/L             | River Ganges           | India   | Occurrence, seasonal variations, and ecological risk of pharmaceuticals and personal care products in River Ganges at two holy cities of India                                                    |
| BT       | 0.1-100ng/L            | Kumho River            | Korea   | Occurrences of microorganic pollutants in the Kumho River by a comprehensive target analysis using LC-Q/TOF-MS with sequential window acquisition of all theoretical fragment ion spectra (SWATH) |
| XT       | 0.1-10ng/L             | Kumho River            | Korea   | Occurrences of microorganic pollutants in the Kumho River by a comprehensive target analysis using LC-Q/TOF-MS with sequential window acquisition of all theoretical fragment ion spectra (SWATH) |

|     |                                           |               |             |                                                                                                                                                                                      |
|-----|-------------------------------------------|---------------|-------------|--------------------------------------------------------------------------------------------------------------------------------------------------------------------------------------|
| BT  | 1210 ng/L                                 | surface water | New Zealand | The removal of metformin and other selected PPCPs from water by poly(3,4-ethylenedioxythiophene) photocatalyst                                                                       |
| TCS | 103 ng/L                                  |               |             |                                                                                                                                                                                      |
| BT  | 286 ng/L                                  | surface water | China       | Suitability of pharmaceuticals and personal care products (PPCPs) and artificial sweeteners (ASs) as wastewater indicators in the Pearl River Delta, South China                     |
| TCS | 80 ng/L                                   |               |             |                                                                                                                                                                                      |
| CBT | 31.9 ng/L                                 |               |             |                                                                                                                                                                                      |
| TCC | 20 ng/L                                   |               |             |                                                                                                                                                                                      |
| MP  | 10 ng/L                                   | Pearl River   | China       | Occurrence and ecological risk assessment of emerging organic chemicals in urban rivers: Guangzhou as a case study in china.                                                         |
| TCC | 2.37-210 ng/L                             |               |             |                                                                                                                                                                                      |
| TCS | 35-1023 ng/L                              | Pearl River   | China       | Simulation of three ppcps existed in major pearl river with an asm model including a separate degrading microorganism                                                                |
| PBs | 3.31–55.2 ng/L in water,                  | Yellow River  | China       | Parabens and their metabolite in surface water and sediment from the Yellow River and the Huai River in Henan Province: Spatial distribution, seasonal variation and risk assessment |
|     | 13.3–37.2 ng/g in sediment                |               |             |                                                                                                                                                                                      |
| PBs | 15.0–164 ng/L, 16.1–31.6 ng/g in sediment | Huai River    |             |                                                                                                                                                                                      |

---

**Factor Contribution > 0.05%**

**PP=Run3**

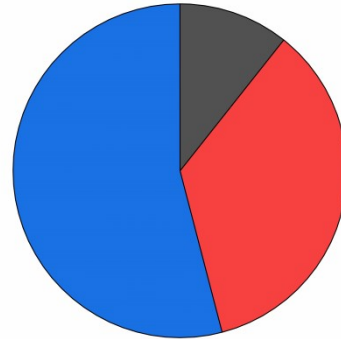

■ **Factor1=0.11186(10.7%)**

■ **Factor1=0.36744(35.2%)**

■ **Factor1=0.56327(54.0%)**

**Fig S1 Contributions from six different sources to the total PPCPs**
