# Supplementary figures and images for: Assessment of occurrence, source appointment, and ecological risks of pharmaceuticals and personal care products in the water–sediment interface of Qiantang River in the Hangzhou region
Source: Royal Society of Chemistry journal article supplement (doi:10.1039/d4em00355a), 2024-01-01

## Factor Contribution > 0.05%

PP=Run3

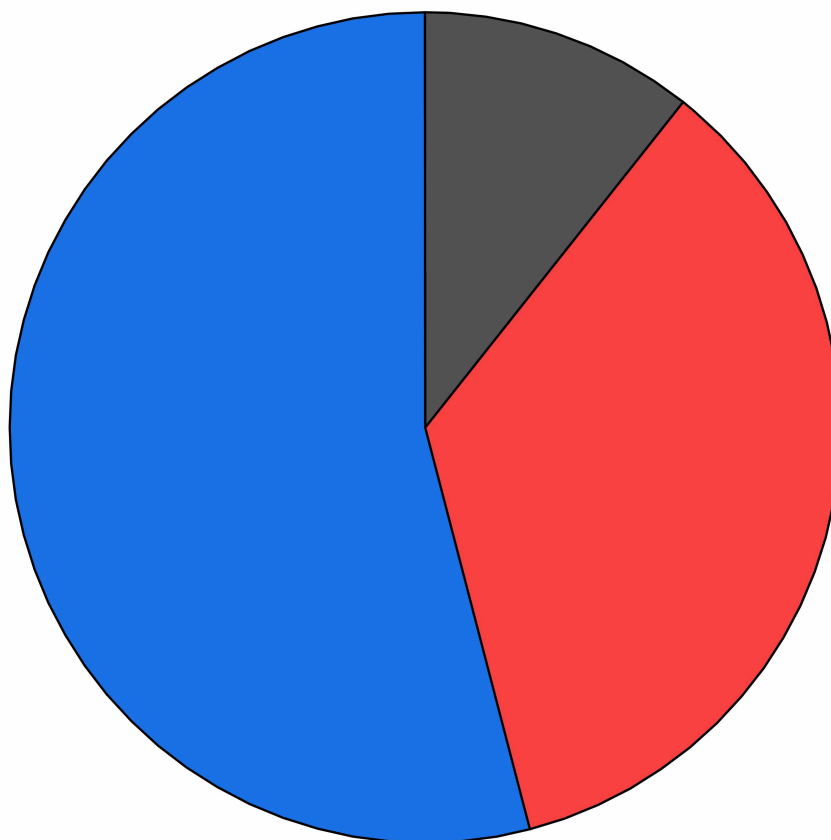

■ **Factor1=0.11186(10.7%)**

■ **Factor1=0.36744(35.2%)**

■ **Factor1=0.56327(54.0%)**

Supplement: d4em00355a1.pdf [file d4em00355a1.pdf]
